# Supplementary material for: The role of RNA N6-methyladenosine methyltransferase in cancers
Source: PubMed Central journal article supplement — Mol Ther Nucleic Acids. 2021 Jan 1;23:887–96. doi: 10.1016/j.omtn.2020.12.021 (PMC7868687; doi:10.1016/j.omtn.2020.12.021), 2021-01-01
Supplement: mmc1.pdf [file mmc1.pdf]

**OMTN, Volume 23**

**Supplemental Information**

**The role of RNA  $N^6$ -methyladenosine  
methyltransferase in cancers**

**Jiali Huang, Zhenyao Chen, Xin Chen, Jun Chen, Zhixiang Cheng, and Zhaoxia Wang**

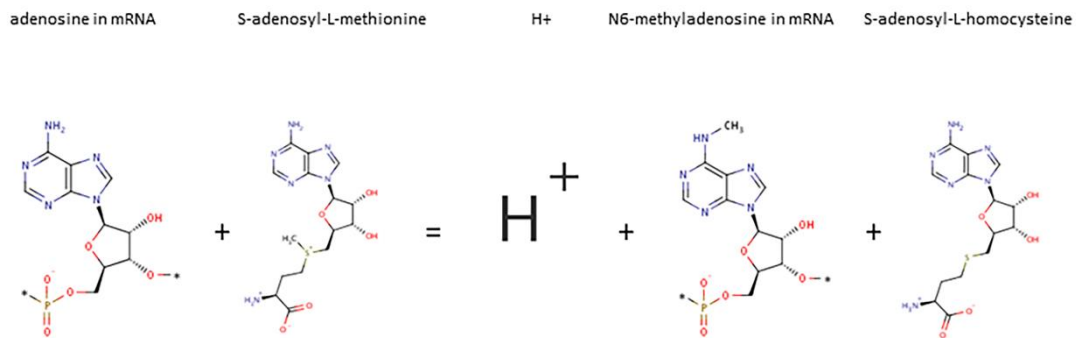

**Figure S1. m<sup>6</sup>A RNA methylation reaction**(<https://www.uniprot.org/>)

**Table S1. Human m<sup>6</sup>A RNA methyltransferase and its corresponding Mouse and Drosophila**

**m<sup>6</sup>A RNA methyltransferase**

| Human                 | Mouse              | Drosophila      |
|-----------------------|--------------------|-----------------|
| Gene names (Synonyms) |                    |                 |
| METTL3 (MTA70)        | Mettl3 (Mta70)     | Mettl3 (Ime4)   |
| METTL14 (KIAA1627)    | Mettl14 (Kiaa1627) | Mettl14 (KAR4)  |
| WTAP (KIAA0105)       | Wtap               | fl(2)d (CG6315) |
| VIRMA (KIAA1429)      | Virma (Kiaa1429)   | -               |
| HAKAI (CBL1)          | Hakai (Cbl1)       | Hakai (CG10263) |
| ZC3H13 (KIAA0853)     | Zc3h13             | Flacc (Xio)     |
| RBM15 (OTT)           | Rbm15 (Kiaa4257)   | -               |
| METTL16 (METT10D)     | Mettl16 (Mett10d)  | -               |
